# Supplementary material
Source: PubMed Central journal article supplement (PMC2597611)
Supplement: blood-2008-02-138065_2.pdf [file blood-2008-02-138065_2.pdf]

The inhibitory effect of NVP-AST487 is ATP competitive for Flt3  
 Vmax is stable and Km increase

Flt3 Ki AST487 NM 001  
 27.11.2006  
 lab book E-37645 (Nicole Martin)

|           |                |        |        |
|-----------|----------------|--------|--------|
|           | average        | STDEV  | SEM    |
| <b>Ki</b> | <b>0.12 µM</b> | 0.0055 | 0.0032 |

|               | Flt3            |                | Ki   |
|---------------|-----------------|----------------|------|
|               | NVP-AST487-NX-5 |                |      |
| 27.11.2006 am | ATP Kmapp       | Vmaxapp        |      |
| control       | 2.3 µM          | 11 nmol/mg*min |      |
| 0.15 µM       | 5.6 µM          | 10 nmol/mg*min | 0.10 |
| 0.3 µM        | 8.2 µM          | 10 nmol/mg*min | 0.12 |
| 0.6 µM        | 11.8 µM         | 8 nmol/mg*min  | 0.14 |

|               | Flt3            |                | Ki   |
|---------------|-----------------|----------------|------|
|               | NVP-AST487-NX-5 |                |      |
| 27.11.2006 pm | ATP Kmapp       | Vmaxapp        |      |
| control       | 2.6 µM          | 13 nmol/mg*min |      |
| 0.13 µM       | 5.2 µM          | 10 nmol/mg*min | 0.12 |
| 0.3 µM        | 8.0 µM          | 10 nmol/mg*min | 0.12 |
| 0.5 µM        | 16.4 µM         | 11 nmol/mg*min | 0.09 |

|            | Flt3            |                | Ki   |
|------------|-----------------|----------------|------|
|            | NVP-AST487-NX-5 |                |      |
| 11/28/2006 | ATP Kmapp       | Vmaxapp        |      |
| control    | 1.4 µM          | 12 nmol/mg*min |      |
| 0.13 µM    | 3.2 µM          | 10 nmol/mg*min | 0.10 |
| 0.3 µM     | 4.6 µM          | 9 nmol/mg*min  | 0.11 |
| 0.5 µM     | 6.6 µM          | 7 nmol/mg*min  | 0.14 |

| Assay conditions |               |
|------------------|---------------|
| Substrate:       | Poly-EY 10 µM |
| Incubation time  | 10 min        |
| enzyme/assay     | 145-150 ng    |
| ATP              | 0.1-210 µM    |
| Tris pH 7.5      | 20 mM         |
| MgCl2            | 3 mM          |
| MnCl2            | 3 mM          |
| PEG 20000        | 250 µg/ml     |
| Na3VO4           | 0.01 mM       |
| DTT              | 1 mM          |

$$K_i = K_m * I / (K_{mapp} - K_m)$$

I = concentration of inhibitor
